# Supplementary material
Source: Springer Nature journal article supplement (http://www.springermedizin.de/resource/supplementary/12871_2010_84_MOESM2_ESM.pdf/9428796)

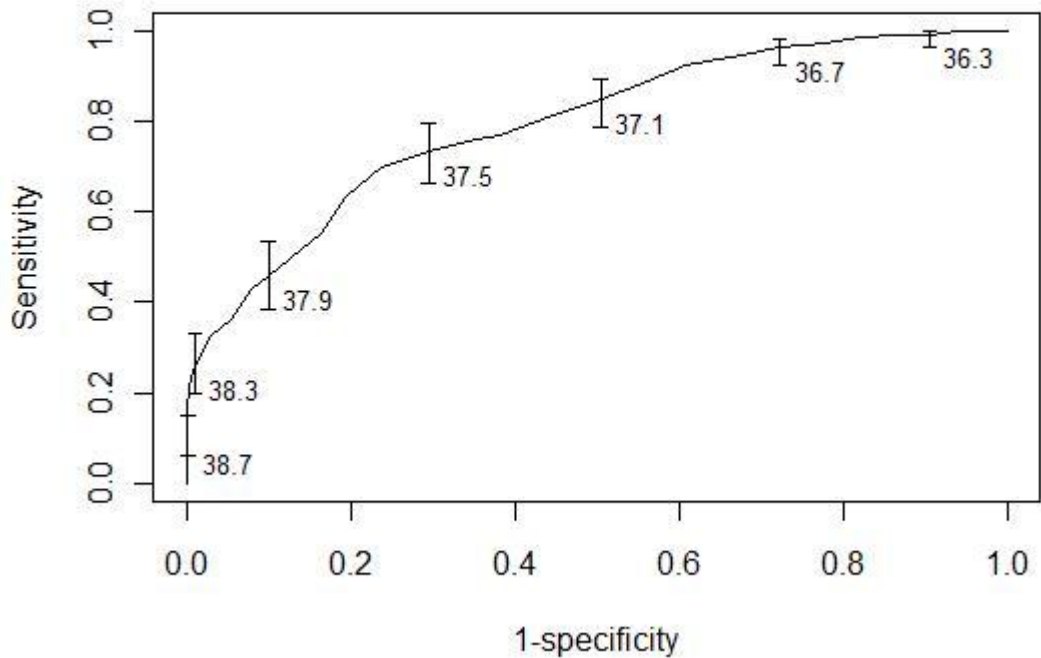

Supplement: MOESM2 [file 9428796]
